# Supplementary material for: Scarf and Akin Osteotomies for Correction of Hallux Abducto Valgus. A Ten-year Retrospective Patient Evaluation From Five Podiatric Surgery Centres Using PASCOM PSQ-10.
Source: Research Square preprint supplement (doi:10.21203/rs.3.rs-1108625/v1), 2021-11-30
Supplement: Supplementary file 1 [file ea5175b231ae6d0ebac4df24.docx]

# Appendix 1

<https://www.pascom-10.com/07.2%20Patient%20satisfaction%20PSQ-10.pdf>
